# Supplementary material for: Two-dimensional hydrogen-bonded networks in crystals of diboronic acids
Source: Royal Society of Chemistry journal article supplement (doi:10.1039/b516402h), 2006-01-01
Supplement: b516402h.pdf [file b516402h.pdf]

Submitted to *CrystEngComm*.  
Version of November 17, 2005

## Supporting Information

### Two-Dimensional Hydrogen-Bonded Networks in Crystals of Diboronic Acids

Kenneth E. Maly<sup>\*</sup>, Thierry Maris, and James D. Wuest

*Département de Chimie, Université de Montréal  
Montréal, Québec H3C 3J7 Canada*

#### Contents

- I. Synthesis of 4,4'-Diphenylacetylenediboronic Acid ..... (S2-S3)
- II. X-Ray Crystallographic Studies ..... (S2-S3)

\*Author to whom correspondence may be addressed: [kenneth.maly@umontreal.ca](mailto:kenneth.maly@umontreal.ca)

#### 4,4'-Diphenylacetylenediboronic acid (**4**)

A solution of bis(4-bromophenyl)acetylene (1.02 g, 3.04 mmol)<sup>1</sup> was dissolved in dry THF (60 mL) and cooled to -78 °C under N<sub>2</sub>. *n*-Butyllithium (4.3 mL, 1.5 M, 6.4 mmol) was then added dropwise, and the mixture was stirred under N<sub>2</sub> with continued cooling for 1 h. Triisopropyl borate (1.6 mL, 1.3 g, 6.9 mmol) was then added slowly. The resulting mixture was stirred at -78 °C for 1 hour and was then allowed to warm to 25 °C. After 1 h, the mixture was quenched with 1 M aqueous HCl and extracted with ether. The combined ether extracts were then extracted with 4 M aqueous NaOH. The aqueous extracts were acidified with 6 M aqueous HCl, and the resulting precipitate was collected by filtration and dried to give 4,4'-diphenylacetylenediboronic acid (**2**; 0.677 g, 2.55 mmol, 84%). The product was further purified by recrystallization from THF/hexane to give compound **4** as a colorless solid: m.p. > 250 °C; <sup>1</sup>H NMR (400 MHz, DMSO-*d*<sub>6</sub>) δ 7.52 (d, 4H, <sup>3</sup>*J* = 8.2 Hz), 7.83 (d, 4H, <sup>3</sup>*J* = 8.2 Hz), 8.18 (s, 4H); <sup>13</sup>C NMR (100 MHz, DMSO-*d*<sub>6</sub>) δ 91.2, 124.5, 131.2, 135.2; HRMS (APCI) calcd for C<sub>14</sub>H<sub>12</sub>B<sub>2</sub>O<sub>4</sub> + H *m/e* 267.09945, found 267.10026.

#### X-ray crystallographic studies

X-ray diffraction data were collected with Cu Kα radiation using a Bruker SMART 2000 CCD diffractometer. The structures were solved by direct methods using SHELXS-97 and refined with SHELXL-97.<sup>2</sup> All non-hydrogen atoms were refined anisotropically, except for disordered solvent molecules. Hydrogen atoms were placed in ideal positions and refined as riding atoms.

#### References

- 1 H. J. Barber and R. Slack, *J. Chem. Soc. Abstracts*, 1944, 612.
- 2 G. M. Sheldrick, in *SHELXS-97, Program for the Solution of Crystal Structures and SHELXL-97, Program for the Refinement of Crystal Structures*, Gottingen, 1997.
